# Supplementary material for: Extending 2D covalent organic frameworks by inserting anthracene for promoted white-light-mediated photocatalysis
Source: Royal Society of Chemistry journal article supplement (doi:10.1039/d4cy00402g), 2024-01-01
Supplement: d4cy00402g1.pdf [file d4cy00402g1.pdf]

1        **Extending the 2D Covalent Organic Frameworks by Inserting**  
2        **Anthracene for Promoted White-light-mediated Photocatalysis**

3

4                                  Yiqiong Liu,<sup>a</sup> Zehao Zhao,<sup>a</sup> Wenshuo Xu,<sup>a</sup> and Weitao Gong<sup>\*a</sup>

5        <sup>a</sup> State Key Laboratory of Fine Chemicals, School of Chemical Engineering, Dalian University of  
6                                  Technology, Dalian 116024, PR China

7                                  Corresponding author, E-mail: [wtgong@dlut.edu.cn](mailto:wtgong@dlut.edu.cn)

8        **Contents**

9        Section 1 Characterization

10       Section 2 Synthetic procedures

11       Section 3 <sup>13</sup>C Nuclear Magnetic Resonance (NMR) spectra

12       Section 4 HOMO and LUMO values

13       Section 5 Exciton binding energy ( $E_b$ )

14       Section 6. Detection of reactive oxygen species (ROS)

15       Section 7 Photoelectrochemical measurements

16       Section 8 Photocatalytic experiment supplement

17       Section 9 <sup>1</sup>H-NMR results of the reactions

18       Section 10 References

## 19 Section 1 Characterization

20 All required solvents and reagents were purchased from commercial sources unless otherwise  
21 specified.  $^1\text{H}$  NMR spectra was obtained by Bruker Avance II 400 instrument. The structure of  
22 polymers was mainly characterized by the Fourier transform infrared (FT-IR) spectroscopy, Nuclear  
23 magnetic resonance (NMR) spectra, and Powder X-ray diffraction (PXRD). The FT-IR and  $^{13}\text{C}$   
24 NMR spectra were recorded from JASCO IR-4100 and Bruker AVANCEIIIHD600 spectrometer,  
25 respectively. PXRD pattern was acquired on Bruker D8 Advance with Cu  $K\alpha$  radiation ( $\lambda = 1.5418$   
26  $\text{\AA}$ ). The Quantachrome Autosorb iQ was used to analyze the porosity. Uv-vis diffuse reflectance  
27 spectra were conducted on JASCO V-750 spectrometer. Mettler Toledo TGA/DSC  $^{3+}$  thermal  
28 analyzer was used to carry out thermogravimetric analysis (TGA). The morphologies were carried  
29 out on FEI Nova NanoSEM 450 and JEM2100. Density functional theory (DFT) computational and  
30 visualization were performed by BDF software within Device Studio program and Multiwfn  
31 program. The CHI 760E electrochemical workstation was employed to examine the photoelectric  
32 properties of two COFs, using the Mott-Schottky curve test, EIS Nyquist plots test, and  
33 instantaneous photocurrent test in a standard three-electrode system. Detection of reactive oxygen  
34 intermediate species were obtained on a Bruker A200-9.5/12 EPR spectrometer. Time-resolved  
35 photoluminescence decay profiles were obtained in Edinburgh Instruments FLS1000.

## 36 Section 2 Synthetic procedures

### 37 Synthesis of 1,3,5-Tris (4-aminophenyl) triazine (TAPT) <sup>1</sup>

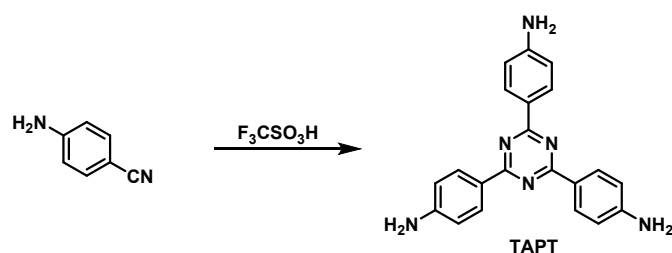

39 Under an inert atmosphere, 4-aminobenzonitrile (0.77 g, 6.54 mmol) and trifluoromethanesulfonic  
40 acid (4 mL, 44.4 mmol) were added to a three-neck round-bottom flask at 0 °C. After warming to  
41 room temperature, the reaction mixture was stirred continuously for 24 h, and then distilled water  
42 (40 mL) was poured into the mixture, followed by 1M NaOH for neutralization. Typically, a deep-  
43 orange precipitate appeared with increasing pH value under basic conditions. The precipitate was  
44 finally filtered, and washed with water and MeOH to afford a pale-yellow product (0.40 mg, 52%).  
45 <sup>1</sup>H NMR (CDCl<sub>3</sub>, 400 MHz) δ (ppm) = 8.36 (d, J = 8.5 Hz, 6H), 6.71 (d, J = 8.5 Hz, 6H), 5.89 (s,  
46 6H).

### 47 Synthesis of anthracene-9,10-dicarbaldehyde (AND) <sup>2</sup>

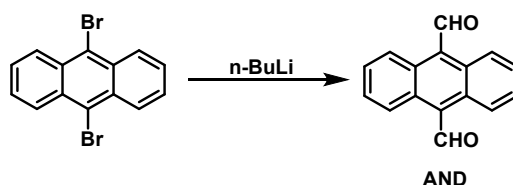

49 A solution of 9,10-dibromoanthracene (4.77 g, 13 mmol) in anhydrous THF (200 mL) was added  
50 to a three-neck round-bottom flask and cooled down to -78°C under an inert atmosphere, then n-  
51 butyllithium (16.9 mL, 27 mmol) was added dropwise to the solution and the mixture was stirred at  
52 -78°C for an hour. Next, anhydrous DMF (4 mL, 52 mmol) was added to the reaction mixture  
53 dropwise, and the mixture was brought to room temperature to stir overnight. Diluted with 15 mL  
54 water, the resulting precipitate was filtered, washed, and purified by recrystallization in DMSO to  
55 obtain an orange needle-like solid (1.55 g, 51%). <sup>1</sup>H NMR (CDCl<sub>3</sub>, 400 MHz) δ (ppm) = 11.47 (s,  
56 2H), 8.72 (d, 4H), 7.69 (d, 4H).

### 57 Synthesis of AND-TAPT

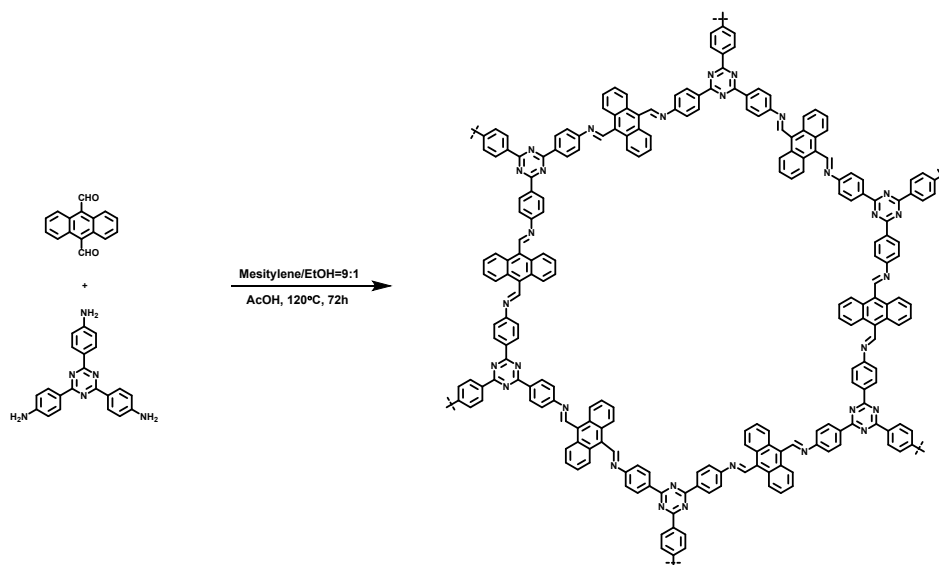

58

59 Synthesis of PDA-TAPT

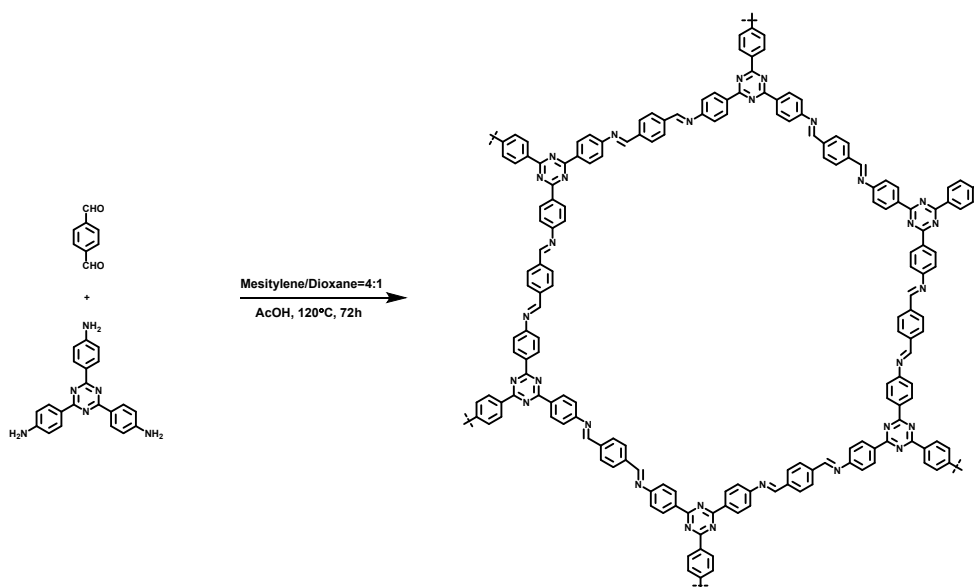

60

61

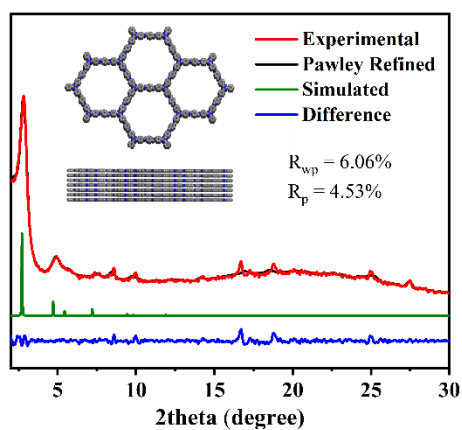

62

63

Fig. S1 PXRD pattern of PDA-TAPT.

### 64 Section 3 $^{13}\text{C}$ Nuclear Magnetic Resonance (NMR) spectra

65 The  $^{13}\text{C}$  cross-polarization magic angle spinning (CP/MAS) NMR spectrum of AND-TAPT further  
66 confirmed the presence of imine bond with  $\text{C}=\text{N}$  resonance at 163 ppm. The strong signals at 125  
67 and 129 ppm can be assigned to the carbon atoms of the phenyl groups, while the relatively weaker  
68 signal at ~194 ppm corresponds to the carbon atoms of terminal aldehyde groups in the AND-TAPT  
69 network. More importantly, the peak at 174 ppm further corroborated the successful incorporation  
70 of triazine into the network. Those clearly showed that the condensation reaction was completed  
71 confirming completion of the reaction.

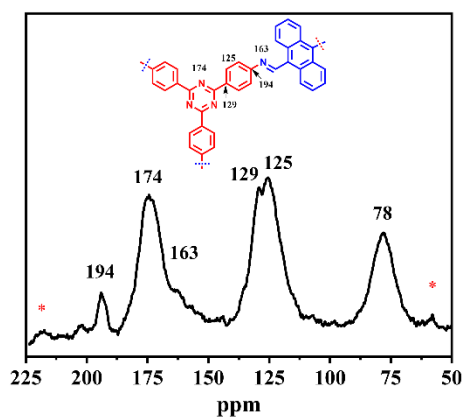

72

73 **Fig. S2** Solid state  $^{13}\text{C}$  NMR spectra of AND-TAPT.

74 **Section 4 HOMO and LUMO values**

75 After being optimized by the BDF software with  $\omega$ B97XD/6-31G (d, p), the orbital energy of the  
76 selected monomer structure was calculated<sup>3,4</sup>. Then, the HOMO and LUMO orbital diagrams were  
77 shown by using the Multiwfn program<sup>5</sup>. As shown in [Table S1](#), both two amine-aldehyde pairs  
78 could form effective D-A pairs.

79 **Table S1** Simulation of HOMO and LUMO values (eV) of monomers and COFs.

|               | TAPT   | PDA    | AND    | PDA-TAPT | AND-TAPT |
|---------------|--------|--------|--------|----------|----------|
| HOMO (eV)     | -5.356 | -7.271 | -5.919 | -9.236   | -8.368   |
| LUMO (eV)     | -1.107 | -2.661 | -3.054 | -0.679   | -0.988   |
| Band gap (eV) | 4.249  | 4.610  | 2.865  | 8.557    | 7.381    |

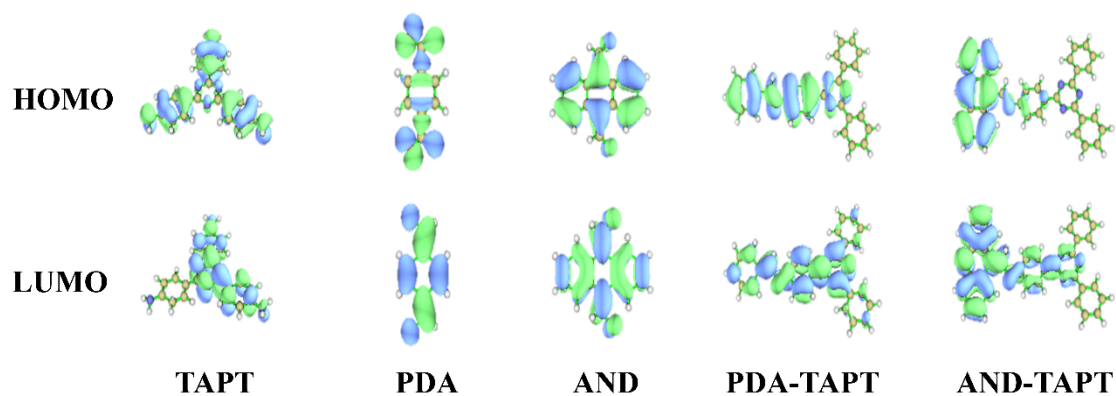

81 **Fig. S3** Simulation of HOMO and LUMO of monomers and COFs.

## 82 Section 5 Exciton binding energy ( $E_b$ )

83 After being optimized by the BDF software with  $\omega$ B97XD/6-31G (d, p), the IP, EA, and  $E_{opt}$  were

84 calculated by using the BDF software with M06-2X/6-31G (d, p), and then exciton binding energy

85 ( $E_b$ ) was obtained by subtracting  $E_{opt}$  from  $E_{fund}$  <sup>4,6</sup>.

86 **Table S2** Calculated exciton binding energy.

|          | IP (eV) | EA (eV) | $E_{fund}$ (eV) | $E_{opt}$ (eV) | $E_b$ (eV) |
|----------|---------|---------|-----------------|----------------|------------|
| AND-TAPT | 7.215   | 0.838   | 6.377           | 3.411          | 2.966      |
| PDA-TAPT | 7.927   | 0.584   | 7.343           | 3.994          | 3.349      |

87 IP: ionization potential;

88 EA: electron affinity;

89  $E_{fund}$ : fundamental gap,  $E_{fund} = IP - EA$ ,

90  $E_{opt}$ : optical gap, the energy gap between  $S_0$  and  $S_1$ ;

91  $E_b$ : exciton binding energy,  $E_b = E_{fund} - E_{opt}$ .

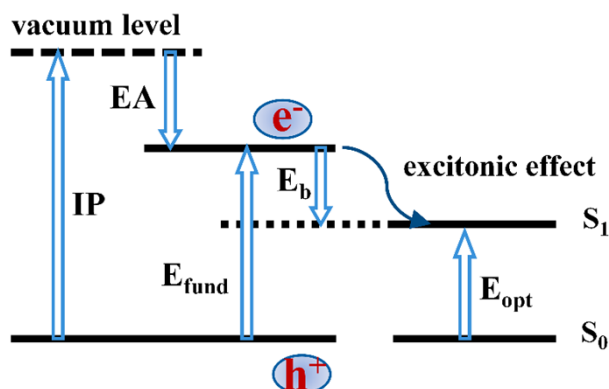

92

93 **Fig. S4** Schematic of various energy gaps.

94 **Section 6. Detection of reactive oxygen species (ROS)**

95 EPR measurements of TEMP-<sup>1</sup>O<sub>2</sub>: 2 mg photocatalyst was added to 0.1 M TEMP (3 ml in CH<sub>3</sub>CN),  
96 and the mixture was continuously irradiated for 2 h with a white lamp (10 W LED) before  
97 measurement.

98 UV-vis measurements of N, N, N', N'-tetramethyl-p-phenylenediamine (NTPD): Typically, two  
99 standard solutions of NTPD were prepared separately in acetonitrile. 2 mg photocatalyst was added  
100 to one of the solutions and both the solutions were stirred for 2 h under constant irradiation by visible  
101 white lamp (10 W LED). Observe the absorption band in the 450-650 nm range.



## 102 **Section 7 Photoelectrochemical measurements**

103 The CHI 760E electrochemical workstation and a standard three-electrode system were used to  
104 analyze the optical and electronic properties of COFs. A 0.1 M Na<sub>2</sub>SO<sub>4</sub> solution, platinum wire  
105 electrode, and Ag/AgCl electrode were used as the electrolyte, counter electrode, and reference  
106 electrode, respectively. 3 mg of photocatalyst and 50 μL 5wt% Nafion were mixed in 1 mL of EtOH  
107 and sonicated for 30 min. For photocurrent measurement, the mixture was homogeneously dispersed  
108 onto FTO (size: 10×20 mm<sup>2</sup>; coated area: 10×10 mm<sup>2</sup>) to obtain the working electrode, and the  
109 switch of the irradiation from 300 W Xe lamp irradiation was realized by a cardboard covered with  
110 tinfoil. For Mott-Schottky analysis and EIS measurement, the mixture was dropped onto glass  
111 carbon to obtain the working electrode.

112 **Section 8 Photocatalytic experiment supplement**113 **Table S3** Heterogeneous photocatalysts for oxidative coupling of benzylamine.

| Photocatalyst               | Light                                       | Conditions                                                               | t (h) | Conv. (%) | Reference |
|-----------------------------|---------------------------------------------|--------------------------------------------------------------------------|-------|-----------|-----------|
| Py-BSZ COF<br>(5 mg)        | 520 nm LED (15 W)                           | benzylamine (0.2 mmol),<br>CH <sub>3</sub> CN (2 mL), rt, air            | 12    | 99        | 7         |
| COF-TpPa<br>(10 mg)         | 420 nm LED (5 W)                            | benzylamine (0.9 mmol),<br>CH <sub>3</sub> CN (6 mL), rt, O <sub>2</sub> | 8     | 99        | 8         |
| BDTA-TAPT<br>(6 mg)         | Xe lamp ( $\lambda$ =420-<br>780 nm, 300 W) | benzylamine (0.1 mmol),<br>CH <sub>3</sub> CN (3 mL), rt, O <sub>2</sub> | 3     | 97        | 9         |
| AN-POP<br>(0.5 mmol%)       | 460nm LED (24 W)                            | benzylamine (0.5 mmol),<br>CH <sub>3</sub> CN (5 mL), rt, air            | 24    | 99        | 10        |
| TFB-33-<br>DMTH (10 mg)     | 454nm LED (30 W)                            | benzylamine (0.2 mmol),<br>H <sub>2</sub> O (2 mL), rt, air              | 20    | 99        | 11        |
| TFA-TTA-COF<br>(5 mg)       | 454 nm LED (30 W)                           | benzylamine (0.2 mmol),<br>H <sub>2</sub> O (3 mL), rt, O <sub>2</sub>   | 20    | 99        | 12        |
| AC-COF<br>(4 mg)            | 440nm LED (32 W)                            | benzylamine (0.2 mmol),<br>CH <sub>3</sub> CN (2 mL), rt, air            | 24    | 99        | 13        |
| PDA-TAPT<br>(1 mmol%, 2 mg) | white LED (10 W)                            | benzylamine (0.2 mmol),<br>CH <sub>3</sub> CN (5 mL), rt, air            | 24    | 16        | This work |
| AND-TAPT<br>(1 mmol%, 3 mg) | white LED (10 W)                            | benzylamine (0.2 mmol),<br>CH <sub>3</sub> CN (5 mL), rt, air            | 24    | 99        | This work |

115 **Table S4** Heterogeneous photocatalysts for selective oxidation of thioanisole.

| Photocatalyst                       | Light             | Conditions                                                                                            | t (h) | Conv. (%) | Reference |
|-------------------------------------|-------------------|-------------------------------------------------------------------------------------------------------|-------|-----------|-----------|
| TCPP-CMP<br>(10 mg)                 | white LED (100 W) | thioanisole (0.5 mmol),<br>CH <sub>3</sub> CN/H <sub>2</sub> O (10 mL, 1:1),<br>rt, O <sub>2</sub>    | 16    | 99        | 14        |
| HP-1<br>(10 mg)                     | 540 nm LED (10 W) | thioanisole (0.2 mmol),<br>CH <sub>3</sub> CN / CH <sub>3</sub> OH (4 mL,<br>3:1), rt, O <sub>2</sub> | 8     | 99        | 15        |
| COF-NUST-31<br>(4 mg)               | 460 nm LED (30 W) | thioanisole (0.1 mmol),<br>CH <sub>3</sub> CN (1.5 mL), rt, O <sub>2</sub>                            | 4     | 99        | 16        |
| NQ-COF <sub>TfppyPh</sub><br>(5 mg) | 460nm LED (18 W)  | thioanisole (1 mmol),<br>CH <sub>3</sub> OH (1.5 mL), rt, air                                         | 12    | 99        | 17        |
| TPDH-<br>PTBA (5mg)                 | 450nm LED (30 W)  | thioanisole (0.15 mmol),<br>CH <sub>3</sub> OH (2 mL), rt, O <sub>2</sub>                             | 12    | 99        | 18        |
| Q-COF-T<br>(2 mg)                   | Xe lamp (300 W)   | thioanisole (0.1 mmol),<br>CH <sub>3</sub> CN (5 mL), rt, O <sub>2</sub>                              | 3     | 99        | 19        |
| PDA-TAPT<br>(1 mmol%, 2 mg)         | white LED (10 W)  | thioanisole (0.2 mmol),<br>EtOH (2 mL), rt, air                                                       | 15    | 57        | This work |
| AND-TAPT<br>(1 mmol%, 3 mg)         | white LED (10 W)  | thioanisole (0.2 mmol),<br>EtOH (2 mL), rt, air                                                       | 15    | 99        | This work |

116

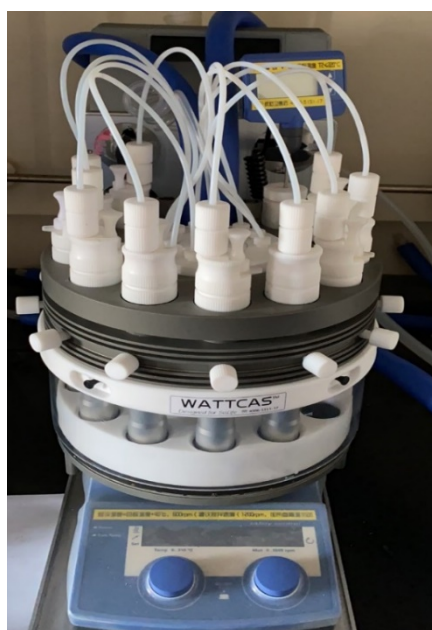

117

118 **Fig. S5.** The photocatalytic reactions were performed by a photoreactor from WATTCAS WP-  
119 TEC-1020HS

120 Section 9 <sup>1</sup>H-NMR results of the reactions

121

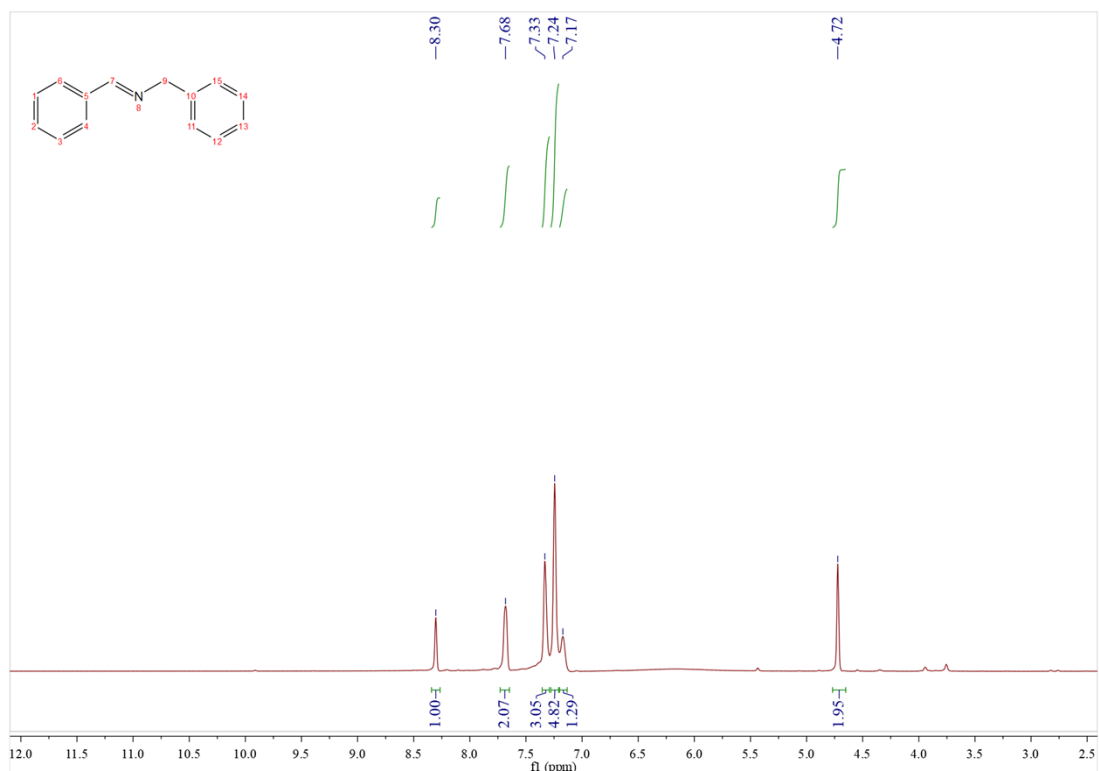

122

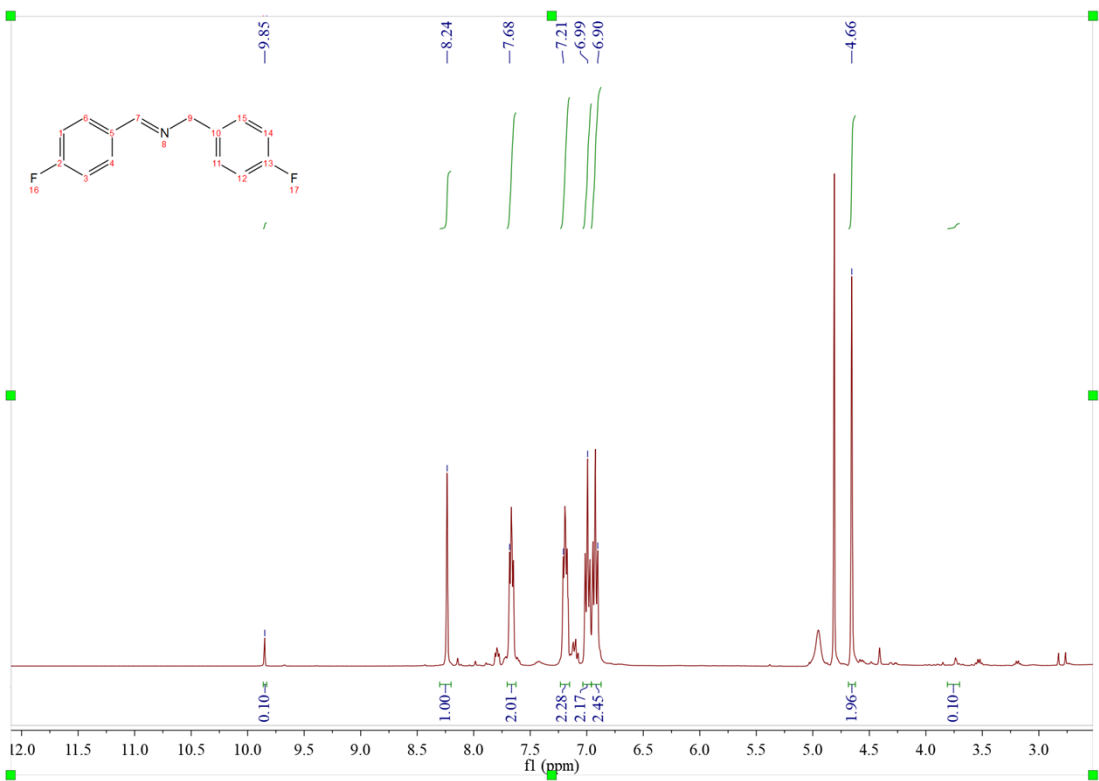

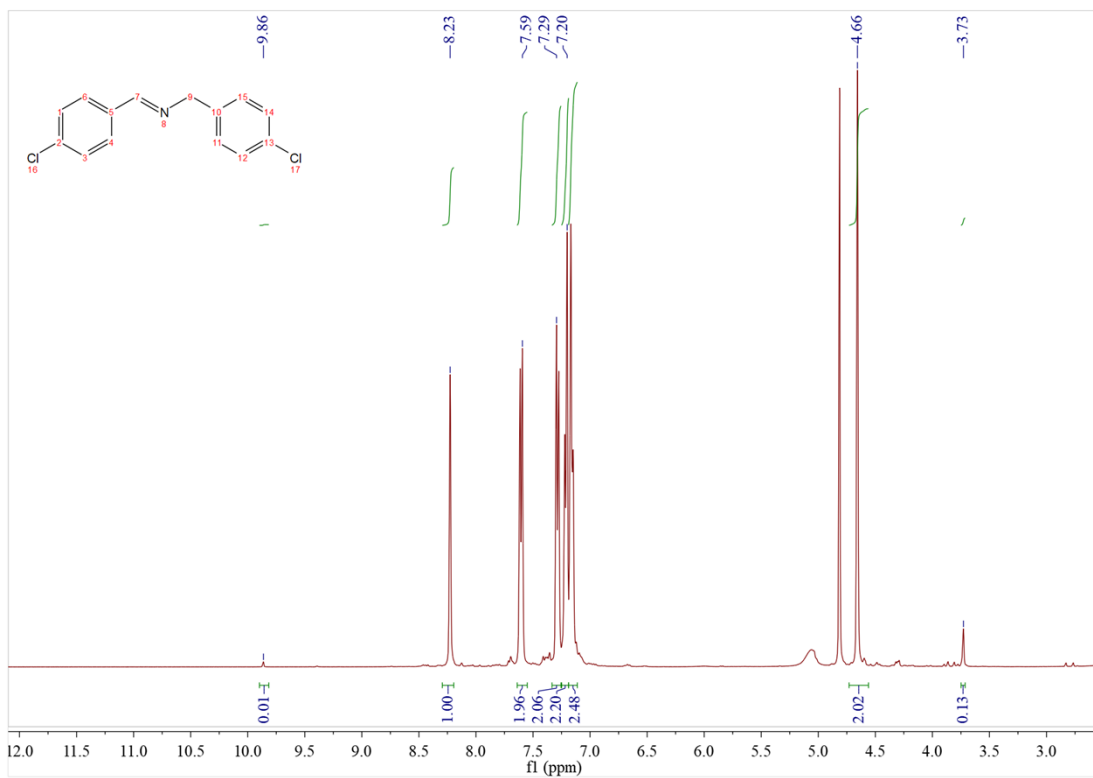

123

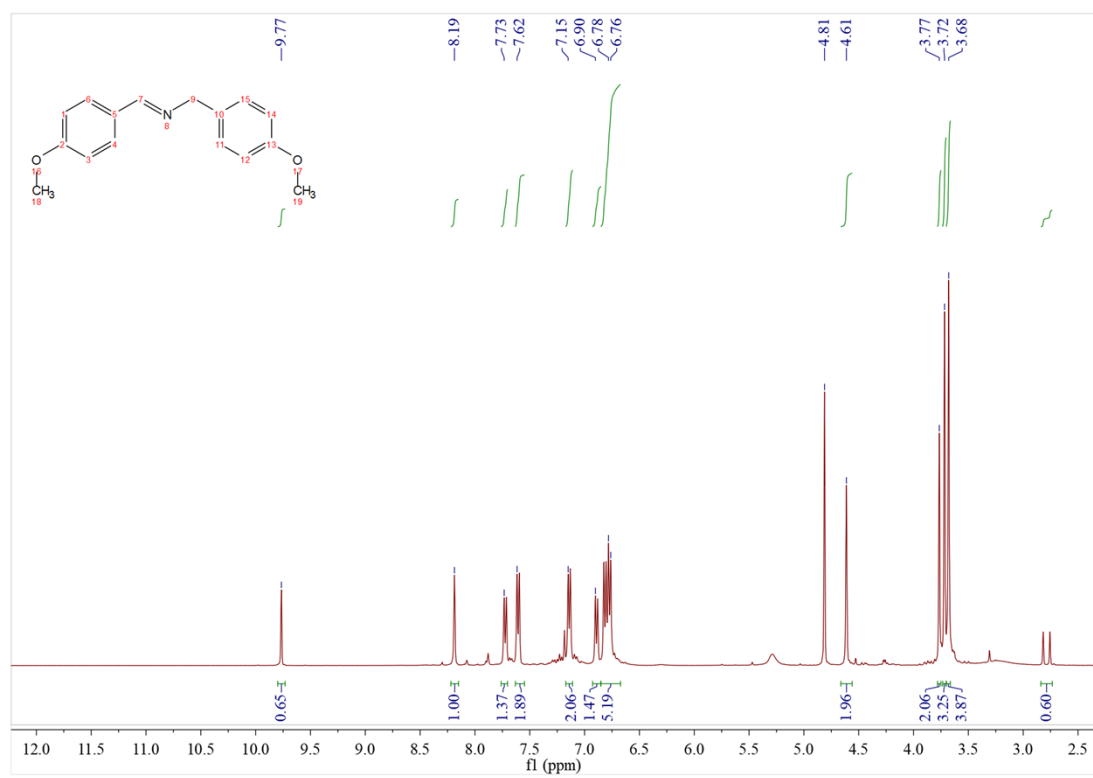

124

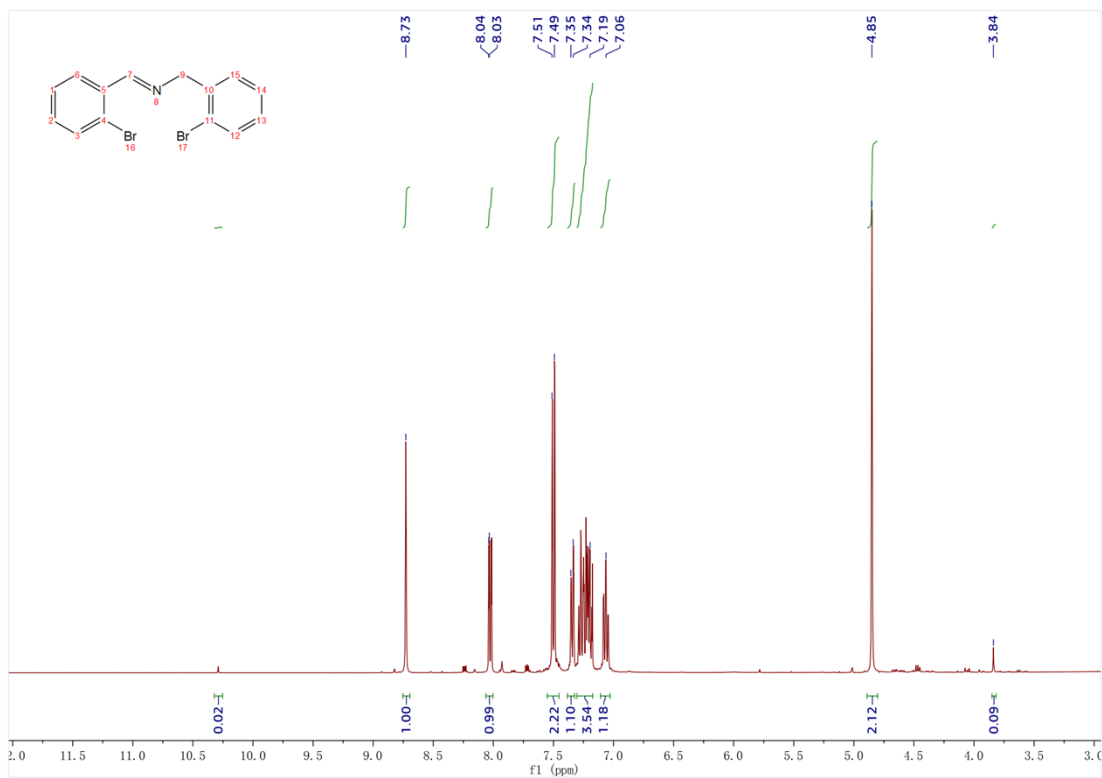

125

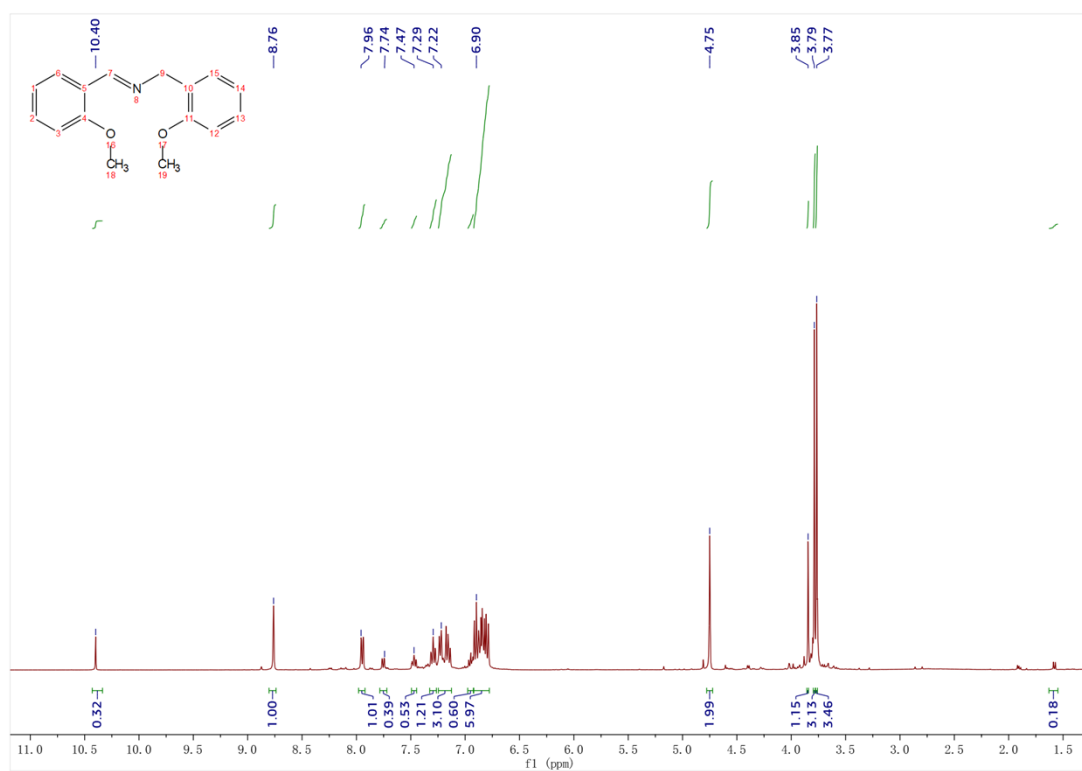

126

127

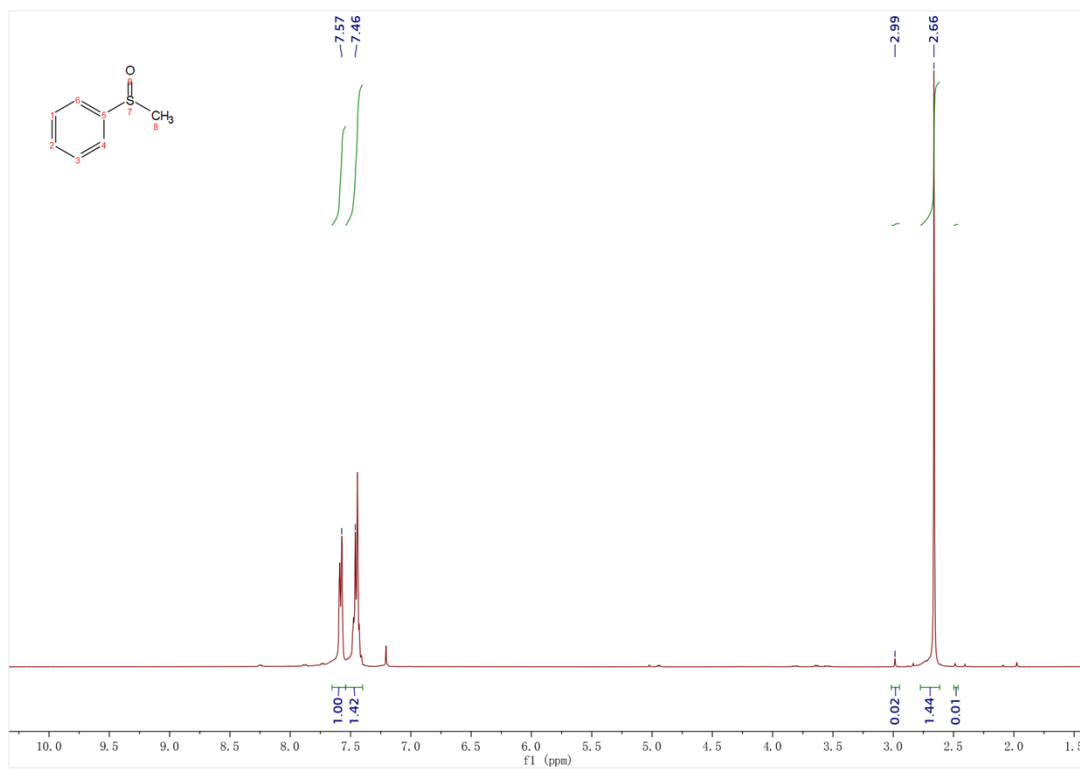

128

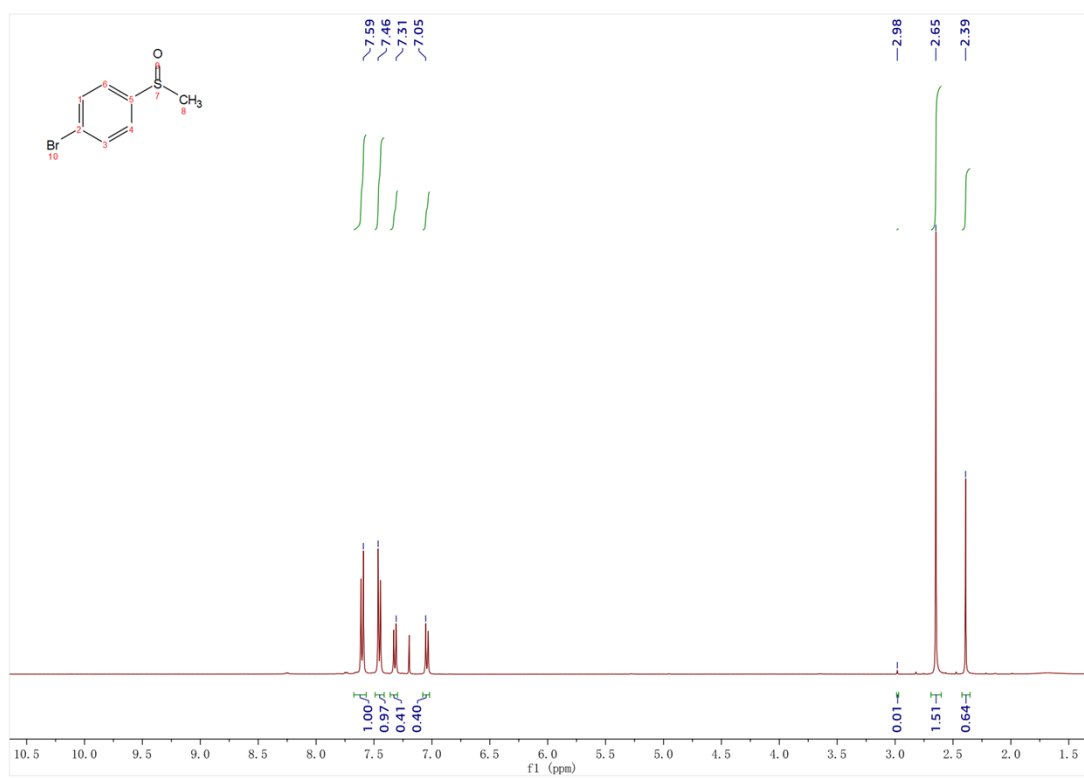

129

130

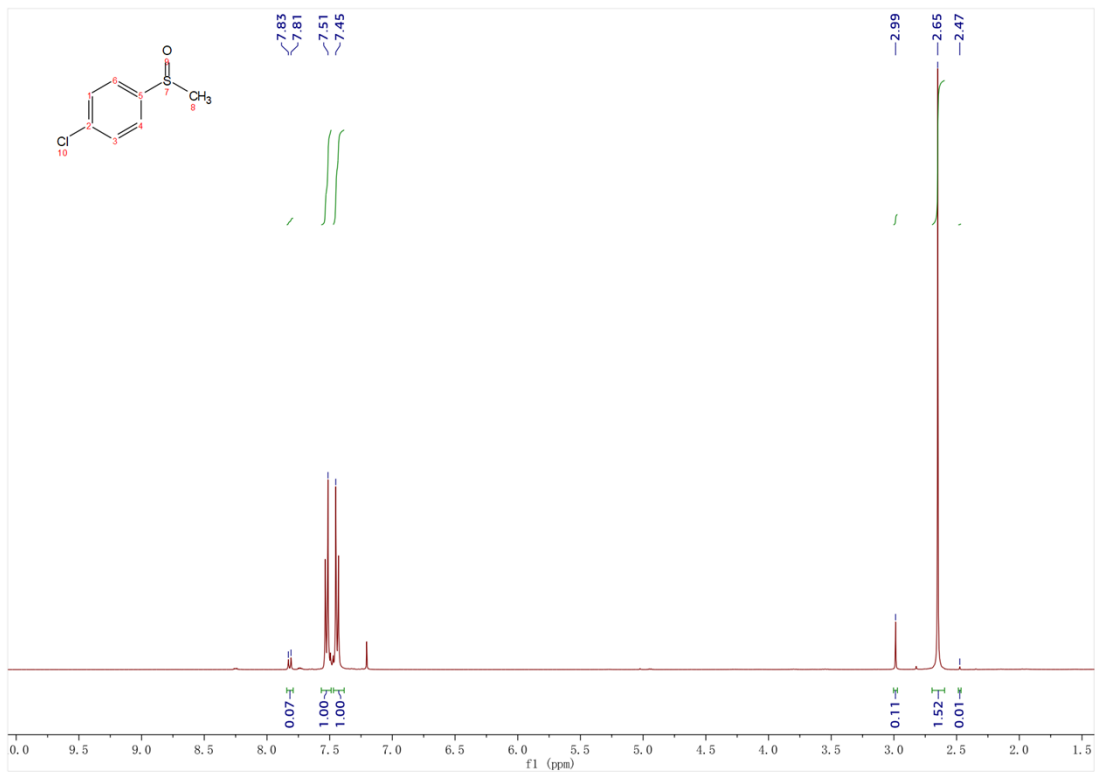

131

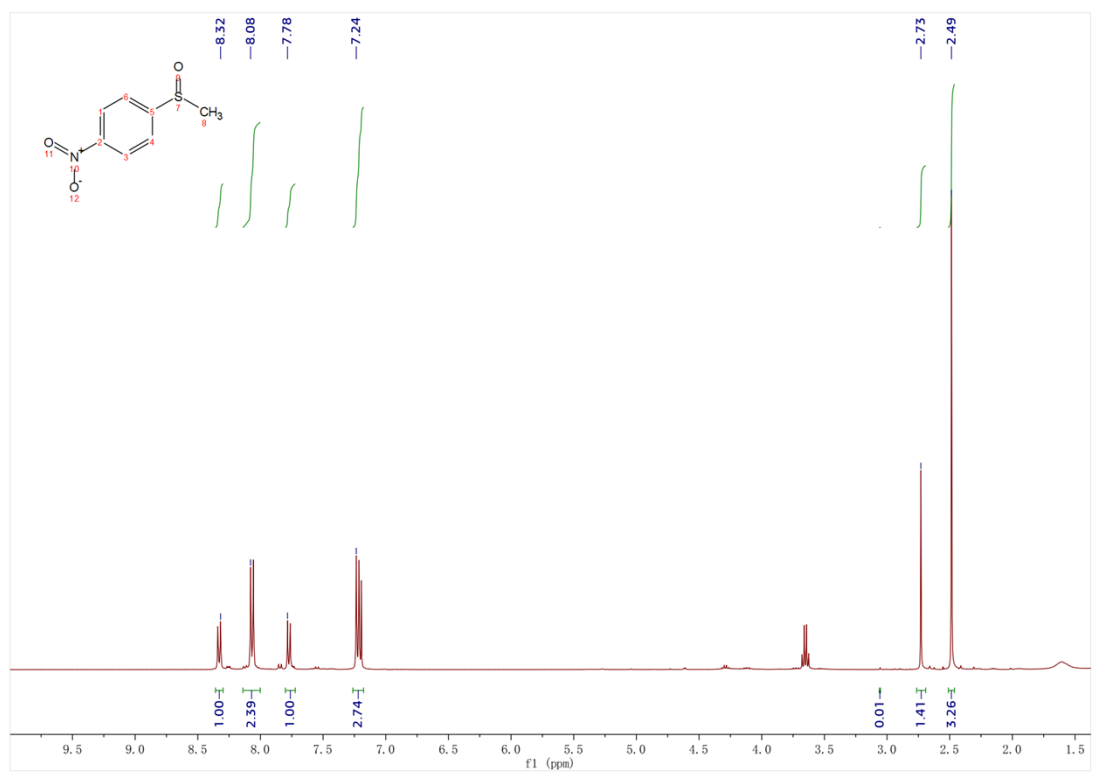



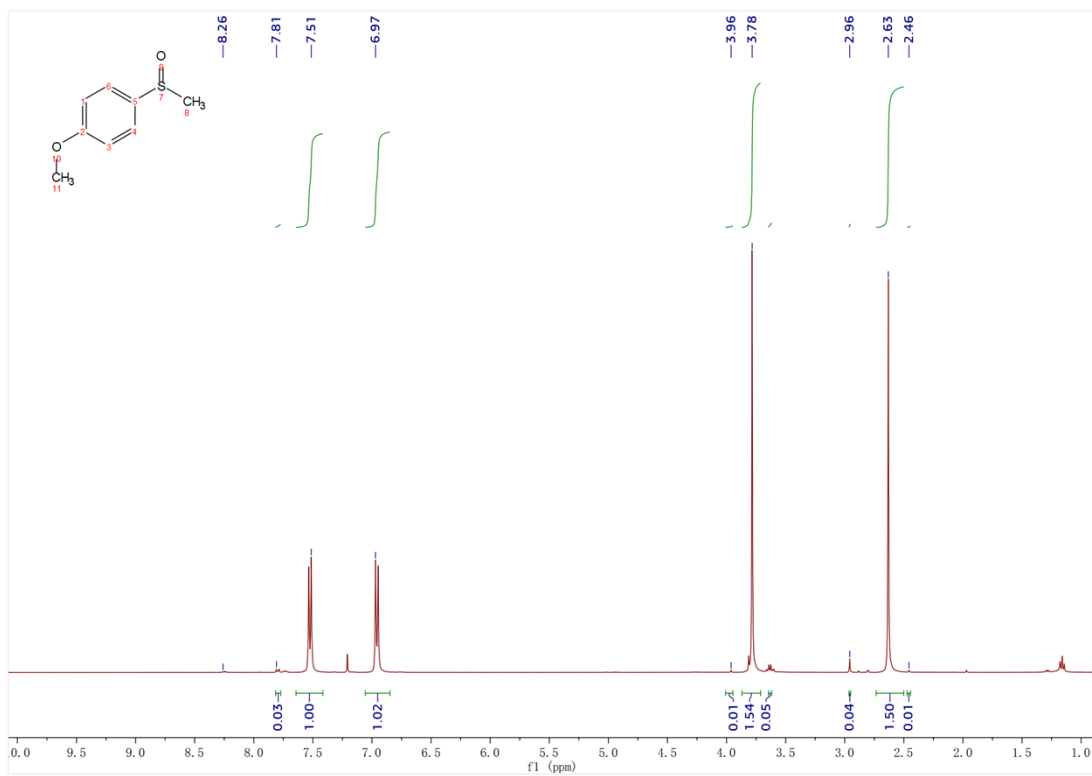

132

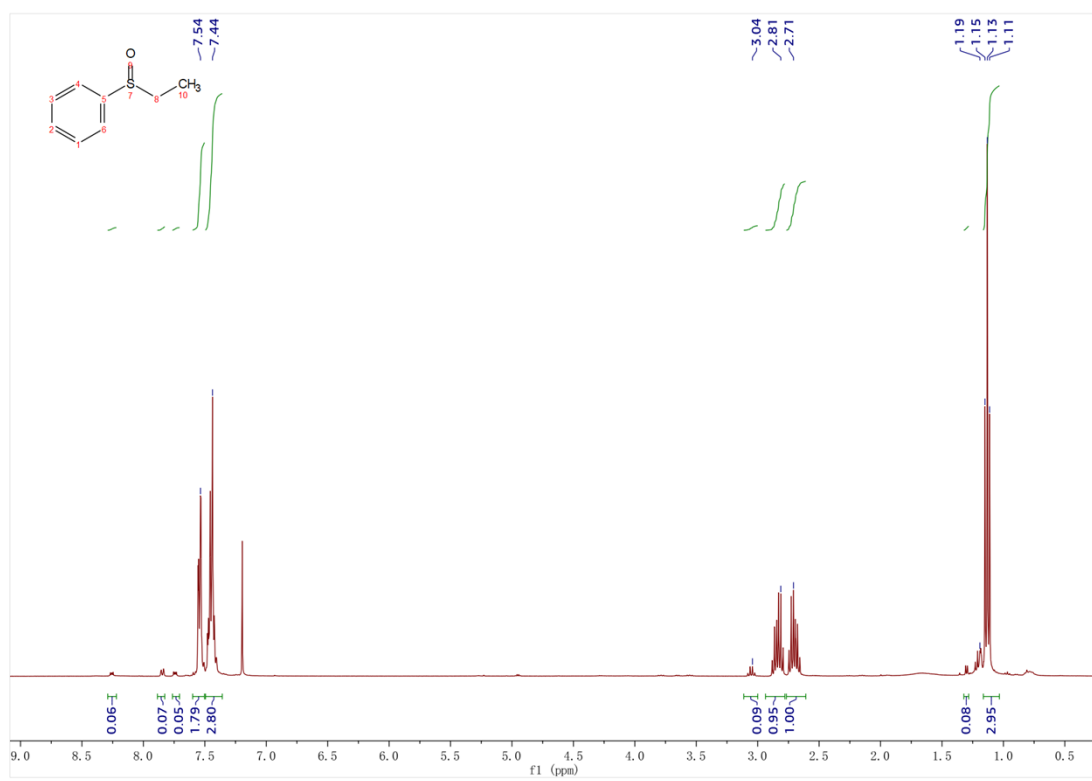

133

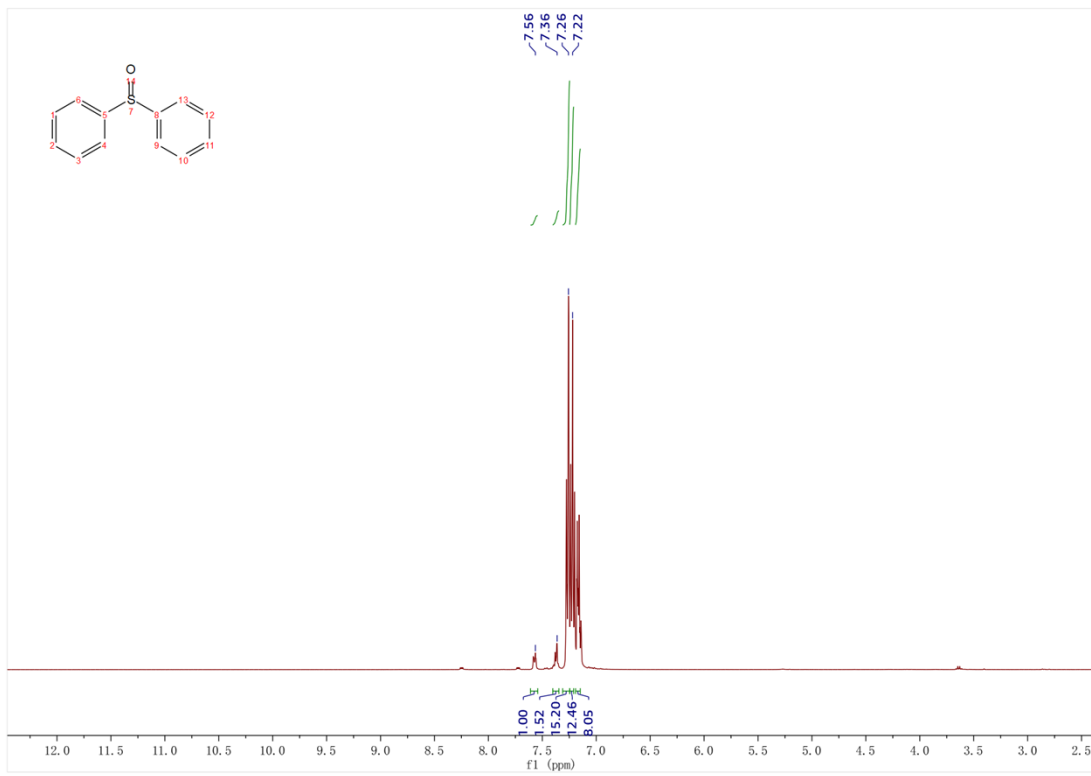

134

135

## 136 Section 10 References

- 137 1. Z. Li, J.-a. Wang, S. Ma, Z. Zhang, Y. Zhi, F. Zhang, H. Xia, G. Henkelman and X. Liu, *Appl.*  
138 *Catal., B*, 2022, **310**, 121335.
- 139 2. A. E. Lee, M. R. Grace, A. G. Meyer and K. L. Tuck, *Tetrahedron Lett.*, 2010, **51**, 1161-1165.
- 140 3. Y. Zhang, B. Suo, Z. Wang, N. Zhang, Z. Li, Y. Lei, W. Zou, J. Gao, D. Peng, Z. Pu, Y. Xiao, Q.  
141 Sun, F. Wang, Y. Ma, X. Wang, Y. Guo and W. Liu, *J. Chem. Phys.*, 2020, **152**.
- 142 4. Z. Wang, Z. Li, Y. Zhang and W. Liu, *J. Chem. Phys.*, 2020, **153**.
- 143 5. T. Lu and F. Chen, *J. Comput. Chem.*, 2012, **33**, 580-592.
- 144 6. Y. Qian, Y. Han, X. Zhang, G. Yang, G. Zhang and H.-L. Jiang, *Nat. Commun.*, 2023, **14**, 3083.
- 145 7. S. Li, L. Li, Y. Li, L. Dai, C. Liu, Y. Liu, J. Li, J. Lv, P. Li and B. Wang, *ACS Catal.*, 2020, **10**,  
146 8717-8726.
- 147 8. Z. Wu, X. Huang, X. Li, G. Hai, B. Li and G. Wang, *Sci. China Chem.*, 2021, **64**, 2169-2179.
- 148 9. Q. Li, J. Wang, Y. Zhang, L. Ricardez-Sandoval, G. Bai and X. Lan, *ACS Appl. Mater.*  
149 *Interfaces*, 2021, **13**, 39291-39303.
- 150 10. L. Liu, W.-D. Qu, K.-X. Dong, Y. Qi, W.-T. Gong, G.-L. Ning and J.-N. Cui, *Chem. Commun.*,  
151 2021, **57**, 3339-3342.
- 152 11. S. Liu, Q. Su, W. Qi, K. Luo, X. Sun, H. Ren and Q. Wu, *Catal. Sci. Technol.*, 2022, **12**, 2837-  
153 2845.
- 154 12. W. Qi, Q. Wu, W. Wang, J. Feng and Q. Su, *J. Photochem. Photobiol. A: Chem.*, 2023, **437**,  
155 114502.
- 156 13. Q. Lin, Y. Yusran, J. Xing, Y. Li, J. Zhang, T. Su, L. Yang, J. Suo, L. Zhang, Q. Li, H. Wang, Q.  
157 Fang, Z.-T. Li and D.-W. Zhang, *ACS Appl. Mater. Interfaces*, 2024, **16**, 5869-5880.
- 158 14. J. Jiang, Z. Liang, X. Xiong, X. Zhou and H. Ji, *ChemCatChem*, 2020, **12**, 3523-3529.
- 159 15. T.-Y. Qiu, Y.-N. Zhao, W.-S. Tang, H.-Q. Tan, H.-Y. Sun, Z.-H. Kang, X. Zhao and Y.-G. Li,  
160 *ACS Catal.*, 2022, **12**, 12398-12408.
- 161 16. Z. Gu, J. Wang, Z. Shan, M. Wu, T. Liu, L. Song, G. Wang, X. Ju, J. Su and G. Zhang, *J. Mater.*  
162 *Chem. A*, 2022, **10**, 17624-17632.
- 163 17. X. Zhao, H. Pang, D. Huang, G. Liu, J. Hu and Y. Xiang, *Angew. Chem. Int. Ed.*, 2022, **61**,  
164 e202208833.
- 165 18. Y. Hu, Y. Ji, Z. Qiao and L. Tong, *Microporous Mesoporous Mater.*, 2023, **362**, 112767.
- 166 19. R. Xue, Y.-S. Liu, H. Guo, W. Yang and G.-Y. Yang, *J. Colloid Interface Sci.*, 2024, **655**, 709-  
167 716.
- 168
